# Supplementary material for: Excitatory and inhibitory receptors utilize distinct post- and trans-synaptic mechanisms in vivo
Source: eLife. 2021 Oct 18;10:e59613. doi: 10.7554/eLife.59613 (PMC8550753; doi:10.7554/eLife.59613)
Supplement: Figure 1—source data 1. [file elife-59613-fig1-data1.xlsx]

## Sheet: Fig.1
	Fig.1D top				Fig.1D middle				Fig.1D bottom
	total area (mm2)				GL thickness (mm)				ML thickness (mm)
	control	DGC	DPC		control	DGC	DPC		control	DGC	DPC
	7.56998e+06	2.75038e+06	5.15577e+06		157.784	20.7308	163.603		192.27	111.929	149.133
	7.44519e+06	2.69427e+06	4.8436e+06		151.558	16.3391	156.171		190.279	115.093	133.446
	6.90615e+06	2.05745e+06	6.01518e+06		151.863	17.0553	144.169		185.89	108.9	133.137
					151.863	13.8886	134.417		183.836	112.232	128.717
					148.97	11.9474	128.965		184.849	108.939	122.664
					136.222	17.0553	124.335		173.224	84.0738	107.738
					127.561	16.5735	117.459		170.519	83.7059	110.062
					115.341	19.0026	107.638		170.592	82.9326	104.54
					113.588	18.5297	102.155		170.635	85.7458	107.254
					112.558	17.0553	102.948		166.165	84.0738	114.191
					110.733	21.2273	125.73		164.26	105.59	112.489
					110.709	26.7586	126.125		159.877	105.554	117.813
					111.57	26.4249	123.138		164.269	103.345	121.745
					120.369	25.6094	134.647		167.794	105.294	116.337
					115.123	31.974	134.91		170.417	104.466	115.481
					137.177	25.8343	200.43		194.558	119.442	131.589
					125.246	22.515	199.629		188.82	114.72	135.538
					122.398	19.7394	194.187		188.496	106.688	136.855
					116.318	20.5627	196.454		184.326	96.6792	138.444
					114.625	19.7394	183.216		182.318	92.8026	139.142
					123.142	23.0568	164.213		167.907	117.232	138.447
					118.878	26.1165	166.684		166.48	115.831	138.911
					115.699	19.4441	159.703		163.216	115.575	137.209
					117.353	21.3903	161.977		165.322	112.797	133.784
					111.987	19.1844	150.061		168.801	109.193	134.302
					110.659	27.9158	106.224		172.034	104.82	116.22
					126.543	30.681	106.242		170.492	103.016	118.248
					122.266	31.974	103.076		172.034	108.712	124.065
					123.594	30.681	106.807		176.521	106.633	129.3
					123.202	31.5367	95.2237		184.264	104.052	133.169
					124.335	21.5589	116.565		170.259	91.5942	121.328
					120.414	25.2596	127.533		173.382	84.5609	119.04
					117.488	21.5589	129.783		170.982	82.353	127.301
					113.988	27.8735	139.368		170.259	76.0415	122.316
					109.602	22.6476	136.047		167.368	71.9437	133.959
					107.67	22.6476	149.424		159.108	75.6517	132.944
					108.839	23.7443	153.227		150.495	75.6517	137.959
					109.207	21.9069	164.275		150.079	81.9596	158.064
					108.1	18.9447	92.3046		146.568	80.4696	115.373
					104.886	21.9069	101.75		149.755	82.6946	110.832
					97.8532	22.6476	98.2368		152.55	83.8095	113.819
					102.234	30.2625	100.855		153.206	101.317	119.045
					102.332	24.1748	106.479		155.319	106.039	117.089
					114.191	22.5258	115.641		154.248	108.253	128.141
					107.588	26.037	125.862		154.881	112.458	132.944
						22.4034	130.633			110.807	132.172
						22.5258	149.037			112.824	135.987
						18.3173	149.424			111.9	130.523
						23.453	142.2			113.365	126.912
						24.9308	142.166			110.254	135.951
						22.4034	135.145			106.737	137.9
						18.9447	136.884			93.8192	133.918
						15.2444	121.684			90.5296	147.981
						14.5049				88.2841
						16.7898				86.0439
						14.6932				88.6339
						16.3331				82.3363
						21.1402				76.7614
						17.4327				79.0907
						15.2444				73.4568
						16.3331				77.5102
						16.7898				80.4696
						14.833				80.2215
						15.9497				83.1175
						14.833				81.9932
						15.2444				82.3363
						13.1106				86.4028
