# Supplementary material for: Excitatory and inhibitory receptors utilize distinct post- and trans-synaptic mechanisms in vivo
Source: eLife. 2021 Oct 18;10:e59613. doi: 10.7554/eLife.59613 (PMC8550753; doi:10.7554/eLife.59613)
Supplement: Figure 2—source data 1. [file elife-59613-fig2-data1.xlsx]

## Sheet: Fig.2
	Fig.2A			Fig.2B			Fig.2C					Fig.2D			Fig.2G			Fig.2H
	Intensity (A.U)			Intensity (A.U)			contact ratio (%)					# of AMPAR particle (N/100 nm)			uEPSC			uEPSC
	control	DGC		control	DGC		PF-Sp		fSp			control PF-Sp	DGC fSp		Baseline	NBQX		Baseline	NBQX
	112.993	4.68452		66.768	91.0248		control	DGC	control	DGC		0.249194	0		18.372	1.6713		46.635	-2.6399
	129.379	6.98855		74.5419	94.0297		100	7.23684	0	86.1842		0.75937	0.312726		27.781	0.12884		22.122	2.5588
	135.697	7.16167		78.1493	100.429		100	7.47664	0	90.6542		0	0		40.192	1.825		38.364	1.284
	156.193	9.7335		80.7043	93.433		100	3.67647	0	91.9118		3.87151	0		35.851	0.18608		23.446	-0.33032
	134.116	8.79328		70.9429	64.4871		100	5.08475	0	83.0508		0.867145	0		24.949	-1.3497		19.034	2.029
	148.752	7.36258		76.6344	70.4439		100	5.30973	0	87.6106		0	0.282936		42.549	0.07102		35.93	1.8475
				75.4274	99.9287		100	7.04225	0	83.0986		0	0.252503					26.008	-0.86496
				67.7462	127.494							0	0.528248
				62.9886	77.4164							0.980603	0.600912
				85.0824	91.9463							0.988907	0.538658
				72.6459	104.22							0	1.31558
				86.1149	125.84							0	0
				61.8105	92.7859							0	1.09938
				73.673	107.113							0.614311	1.03784
				72.9115	76.027							0.644173	0.834331
				74.901	87.5907							2.22913	2.2691
				63.1064	81.7898							0	0
				62.4921	102.107							0.224158	0.325887
				69.9919	112.69							0.343687	0.775554
				75.2929	101.229							1.37724	0
					100.779							0	1.9423
					86.9219							0.924092	1.43324
					95.3125							0.384411	0
					93.5137							1.09005	0.812743
												0.325315	0.463734
												0.897429	0.785082
												0	0.461531
												0.357328	0
												0.449379	0.570601
												1.59816	0.811734
												0	0
												0.527908	0
												0	0
												1.26746	0.86855
												0.27751	1.47311
												0	0.999553
												0.931283	0
												0.292644	0.510326
												1.11605	0.353528
												0.682631	0
												0.876091	1.38359
												1.63432	0
												0	0
												0	1.366
												0.561231	1.24264
												0	1.04282
												1.38226	1.0933
												0.617946	0.616487
												0.814738	1.00569
												0	0
												0.832152	0.239074
												0.351104	1.49408
												0	0.819301
												1.40416	0.432066
												0	0.913997
												0.840696	0.244649
												0	0.681965
												0	0.496559
												0	1.05761
												0	0
												0.805907	0.747743
												0.539062	0
												1.44993	0
												0.553764	1.42741
												0	0.536159
												0	0.523596
												0.813142	1.19833
												0	1.31647
												0.540351	2.2248
												1.22243	0.367217
												1.96333	0
												0.384232	1.27293
												0.830206	0.52642
												0.320736	0.649142
												0.410868	0.468077
												0.390163	0.414586
												1.15445	0.78605
												0.409429	0.246733
												0	0
												0.89536	0.744656
												0	0
												2.91229	1.09614
												0	0.284455
												0.267831	0
												0.881512	0.5761
												0.492008	0.487591
												1.21497	0
												1.9579	0
												2.18003	1.31739
												1.42116	0
												0	0
												0	0
												0	0.494016
												1.43729	0
												1.00386	1.66937
												0.670683	0.831316
												0	0.470192
												0.468565	0.919676
												3.15074	0.789326
												0.66387	2.62699
												0	1.97279
												0	0.366694
												0	0.717294
												0.469123	0.926232
												0	0.854268
												0	0.607651
												0	1.84322
												0	0.385278
												1.78492	0
												0.492566	0.645337
												0.911207	0.545277
												0.520875	0
												3.05427	0.469408
												0.677712	0.396724
													0.887959
													0
													0.403663
													0.752395
													0
													0
													0
													1.23229
													1.51413
													2.01884
													1.41022
													2.1645
													0.726727
													2.40836
													0.33616
													0
