# Supplementary material for: Excitatory and inhibitory receptors utilize distinct post- and trans-synaptic mechanisms in vivo
Source: eLife. 2021 Oct 18;10:e59613. doi: 10.7554/eLife.59613 (PMC8550753; doi:10.7554/eLife.59613)
Supplement: Figure 3—source data 1. [file elife-59613-fig3-data1.xlsx]

## Sheet: Fig.3
	Fig.3A			Fig.3B								Fig. 3C
	# of pincta (N/ mm)			Contact ratio (%)					Synaptic cleft (nm) described in manuscript			# of AMPAR particle (N/100 nm)
	control	DGC		PF		MLId			control PF	DGC MLId		control PF-Sp	DGC MLId
	8.22126	4.44866		control	DGC	control	DGC		15.2201	31.1376		2.12694	1.85369
	11.5471	4.569		100	0	0	86.2069		16.2137	28.8826		0.422915	1.64783
	9.98431	5.09231		100	5	0	90		15.9466	31.5528		1.50599	1.71323
	8.46311	6.38792		100	0	0	93.75		7.4283	26.1339		1.38132	2.63938
	9.74812	4.53888		100	6.06061	0	84.8485		7.58434	19.5339		3.38507	1.00323
	9.07269	4.25937		100	4.87805	0	80.4878		16.9591	23.518		3.63332	2.9199
				100	10.2564	0	79.4872		17.4508	16.2778		0.915138	3.39989
									15.7165	25.3348		1.17812	2.12395
									20.1827	22.5981		0.963639	2.77984
									16.8976	22.0087		1.96415	2.43524
									12.1268	19.9231		1.61193	1.04818
									14.6093	18.0375		0	4.71391
									14.7952	20.2149		1.46662	2.79075
									13.1662	22.7301		0.795845	1.09594
									10.8225	33.5634		1.48214	2.25909
									10.3303	29.7482		1.07943	3.17396
									10.0623	33.083		0.885799	3.3879
									11.3278	43.2479		2.20041	2.15915
									14.6182	31.9585		2.35886	3.70554
									9.08346	36.0064		0.652793	5.37359
									9.62602	42.7211		1.07585	3.65944
									20.6417	46.1986		0.883555	0.934615
									15.2201	51.1935		1.49934	3.64347
									17.5697	47.9676		0.52612	3.39174
									17.6141	44.7476		3.11795	2.40019
									13.2352	34.9202		0.328134
									10.2036	37.8771		0.853604
									21.7051	41.2992		0
									20.3176	21.2629		0.836347
									15.2201	22.8444		0
									18.8766	26.9237		3.11402
									21.9377	21.22		1.00424
									16.9053	19.6931		0.413797
									20.6606	25.2525		0.4638
									21.2384	28.6155		2.10052
									13.5077	25.5089		2.24321
									9.36562	29.0846		1.00102
									14.2941	35.7452		1.74392
									17.331	33.1773		1.88529
									18.1669	36.5339		3.07418
									20.6417	24.2375		2.50111
									16.2057	31.0832		1.92024
									17.2633	28.9006
									12.1268	29.5243
									15.8237	28.3551
									12.6726	25.3297
									13.1662	24.8787
									13.7843	25.3913
									13.4691	28.2447
									12.8763	24.8735
									20.3176	26.7831
									24.9205	25.1234
									22.6556	23.4127
									23.1893	22.6556
									19.9231	37.8014
									18.9797	45.5689
									19.2858	40.3331
									17.0509	21.5788
									19.427	17.4508
									15.0048	40.1877
									15.0654	37.1415
									11.6562	40.0742
									13.4787	31.0203
									17.1499
									11.2007
									19.0482
									18.0808
									12.4236
									12.987
									16.7117
									19.1775
									18.8835
									17.2633
