# Supplementary material for: Excitatory and inhibitory receptors utilize distinct post- and trans-synaptic mechanisms in vivo
Source: eLife. 2021 Oct 18;10:e59613. doi: 10.7554/eLife.59613 (PMC8550753; doi:10.7554/eLife.59613)
Supplement: Figure 4—source data 1. [file elife-59613-fig4-data1.xlsx]

## Sheet: FIg. 4
	Fig. 4D (top, middle, bottom)
	# of VIAAT (N/ 10 mm)		# of GABAARa1 (N/ 10 mm)
	control	DPC	control	DPC
	4.48122	0.393594	9.38923	0.59039
	4.47581	0.40645	13.0205	1.01612
	5.27676	0.557508	11.7408	1.11502
	4.16477	0.352811	9.19123	1.23484
	3.7509	0.544496	7.60897	1.45199
	3.98732	0.487112	10.6552	0.974225
	3.2231	0.531803	9.24617	1.24087
	4.91431	0.307655	10.1821	1.53827
	3.77919	0.710004	6.75363	2.01865
	3.27957	1.61106	6.86616	2.18643
	2.74492	0.673323	4.40558	3.13069
	7.0857	0.343099	10.046	1.66675
	4.43863	0.656256	8.20721	3.15484
	6.16752	1.63689	8.838	1.51799
	5.37738	0.779061	7.04302	1.48404
	4.18162	1.05905	11.1802	2.08962
	5.56619	1.09791	7.97623	1.46866
	4.10547	1.24855	9.54364	4.13374
	4.96407	0.91873	10.057	2.44146
	4.71969	0.250133	8.96392	1.04159
	4.39861	0.362813	11.0878	2.10856
	6.394	0.749181	9.74365	2.19789
	4.01111	0.765374	8.19553	2.76788
	5.34605	0.816416	13.662	2.62613
	9.29694	1.11994	8.49062	0.966243
	4.31344	0.6788	5.4084	3.20319
	8.70553	0.667221	8.03209	1.62023
	4.50699	1.15588	4.95943	1.96
	6.42155	1.04557	7.18348	2.87504
	6.76958	0.291299	6.87539	3.45549
	5.31129	0.139355	9.73581	2.73154
	4.88502	0.361511	7.2603	1.59735
	5.08111	0.617399	7.77344	3.84959
	4.67598	0.659113	8.77531	1.41053
	4.73967	0.808991	7.43473	6.15969
	5.27019	1.47084	7.03168	2.83565
	6.18937	0.780724	9.35772	5.15122
	5.25017	0.64154	8.71076	1.04682
	6.03658	2.01563	12.652	1.22399
	7.46107	0.832263	11.0974	3.63731
	7.02678	0.925416	11.0485	3.26183
	7.53551	1.12164	15.1075	3.90245
	5.93693	0.108768	11.688	3.31309
	9.36742	0.452789	11.4913	2.74624
	6.43792	0.69218	10.8168	3.45902
	6.52081	0.80364	9.63233	2.72611
	4.97325	0.965	9.07739	3.94019
	6.78614	0.747435	12.7092	2.3521
	4.61143	0.406616	7.95561	3.77041
		2.51005		1.13783
		1.85647		2.52353
		0.74974		3.55586
		0.210798		2.57893
		0.594209		1.00881
		0.509846		3.25342
		0.837784		1.34222
		0.735818		1.64784
		0.905557		3.40203
		0.37505		1.79689
		1.21581		1.81476
