# Supplementary material for: Excitatory and inhibitory receptors utilize distinct post- and trans-synaptic mechanisms in vivo
Source: eLife. 2021 Oct 18;10:e59613. doi: 10.7554/eLife.59613 (PMC8550753; doi:10.7554/eLife.59613)
Supplement: Figure 5—source data 1. [file elife-59613-fig5-data1.xlsx]

## Sheet: Fig. 5
	Fig. 5F Left			Fig. 5F Right, Fig. 5G
	# of Lower MLI per 100 um			# of VIAAT (N/ 10 mm)		# of GABAARa1 (N/ 10 mm)
	pNOS GFP	pNOS cre		pNOS GFP	pNOS cre	pNOS GFP	pNOS cre
	14.5111	12.0173		4.38109	3.8967	3.42868	2.27308
	10.7945	9.28216		4.09781	4.1766	4.95152	2.00477
	13.6543	8.70248		3.78707	2.67975	3.78707	2.67975
	13.082	6.24525		4.39033	3.18993	5.67084	1.3956
	13.5853	8.73527		4.58708	3.03861	3.11266	2.3989
	14.8905	12.2919		4.23307	2.00519	4.70341	2.20571
	13.8288	7.02799		4.43477	3.3701	3.58193	1.59636
	14.1899	14.2041		4.15937	3.14533	4.00532	2.59028
	12.4413	9.06137		3.54312	1.8866	3.69717	3.35395
	12.3388	10.4919		3.70022	2.2883	2.98864	3.43245
	16.7916	6.8218		3.78288	3.32456	4.38814	1.89975
	13.8978	9.01987		4.17266	2.49767	3.04925	2.66419
		9.90076		4.43548	1.89137	3.64343	1.73376
		10.1186		6.22802	2.25366	4.20812	2.42702
		8.27384		4.89411	2.65527	3.42588	4.31482
				4.84636	1.88809	2.51293	2.72724
				4.50551	3.26758	4.02277	4.80526
				3.4643	3.42032	4.61907	3.93337
				2.9309	2.74682	4.72201	1.83121
				3.87911	2.39598	4.65493	3.42283
				3.85443	2.23701	3.85443	3.61363
				3.75795	2.78181	4.19156	3.37791
				3.62741	2.17308	4.20779	3.10439
				4.66472	2.49194	5.86852	3.81121
				3.7483	2.86511	4.23721	3.00154
				2.99337	2.44677	4.09619	3.31033
				3.4249	2.06968	4.56653	2.36535
				3.27133	2.28954	5.07057	2.59481
				4.69098	2.39625	4.69098	3.31788
				4.25113	3.92465	4.55478	3.92465
				4.31448	3.66776	5.03356	3.50104
				4.84063	2.69038	4.51792	3.22846
				4.13862	2.91835	4.90503	2.15036
				4.72246	2.65654	4.8748	2.65654
				5.26458	2.80737	5.92266	2.3641
				4.75648	3.46084	3.98931	3.27869
				3.67533	1.13945	6.21004	2.84862
				5.83039	2.08562	4.09703	2.95463
				4.39526	1.64989	5.45012	2.38318
				4.78995	2.32256	5.09898	3.29029
				5.96404	2.78496	5.39604	2.62114
				4.85512	2.14534	4.52028	1.98031
				4.52138	1.97533	5.2448	2.88701
				4.64265	1.6793	6.03545	2.59528
				3.75239	4.17298	6.48141	4.36266
				4.71507	2.90759	6.75826	2.90759
				3.60359	3.93771	4.25879	3.62269
				4.80133	1.92604	4.48124	2.08654
				4.77481	3.10594	4.09269	2.48475
				4.20989	1.79463	4.56072	2.19343
				3.22962	2.31417	4.84444	2.31417
				4.39112	2.8753	4.59072	2.02962
				4.1288	1.39711	4.45911	2.79423
				4.68854	1.7758	4.18619	1.7758
				4.44669	2.08576	4.15024	2.24621
