# Supplementary material for: Excitatory and inhibitory receptors utilize distinct post- and trans-synaptic mechanisms in vivo
Source: eLife. 2021 Oct 18;10:e59613. doi: 10.7554/eLife.59613 (PMC8550753; doi:10.7554/eLife.59613)
Supplement: Figure 6—source data 1. [file elife-59613-fig6-data1.xlsx]

## Sheet: Fig. 6
	Fig. 6 C			Figure 6E, top			Figure 6E, bottom
	# of varicosity (N/10 mm)			Overlap area per varicosity (um2)			# of overlap per varicosity
	GFP	Nrxn3a GFP		GFP	Nrxn3a GFP		GFP	Nrxn3a GFP
	3.28335	3.46643		0.0248987	0.078453		0.346939	1.28
	3.90771	1.88853		0.0100789	0.042716		0.136842	0.829787
	4.93469	2.6314		0.005071	0.078453		0.0646766	1.28
	5.34576	2.28175		0.0163444	0.0544812		0.266667	0.888889
	2.00533	3.35643		0.0551194	0.0231652		0.260163	0.333333
	2.07743	1.98688		0.0172157	0.0276357		0.163934	0.368421
	2.06277	2.47264		0.00661864	0.187896		0.114286	2.83333
	2.60275	1.9484			0.0433414			0.677419
	2.34924	2.5635			0.0142555			0.307692
	2.22081	2.31279			0.0276696			0.333333
	2.06671	2.61584			0.0351768			0.666667
	2.35531	1.94546			0.0495817			0.578947
	2.75298	1.65355			0.0666001			1.3125
	2.31089	2.55167			0.0257391			0.333333
	3.05366	2.01295			0.145787			1.12
	2.50064	2.89932			0.0966897			1.08696
	2.45323	1.87667			0.0854218			1.03125
	2.24569	3.45437			0.0288943			0.193548
	3.04833	2.42735
	2.32832	2.71065
	2.40947	1.98069
	2.82857	2.7104
	3.23482	4.35113
	1.74705	1.90132
	2.99427	2.96814
	2.74048	3.01574
	3.09067	2.18681
	1.43823	5.48843
	2.48922	5.47038
	2.40943	3.06487
	3.50673	1.70261
	0.963896	2.51691
	3.24722	2.91357
	2.76541	1.56451
		1.42273
		2.65179
		2.15437
		6.1044
		2.78421
		3.93842
		3.55735
		2.76915
		3.50432
		3.97604
		1.66824
		2.78516
		3.05502
		1.06809
		3.14373
		4.17199
