# Supplementary figures and images for: Excitatory and inhibitory receptors utilize distinct post- and trans-synaptic mechanisms in vivo
Source: eLife journal article supplement (doi:10.7554/elife.59613), 2021-10-18

Some of membranes were cut before blotting

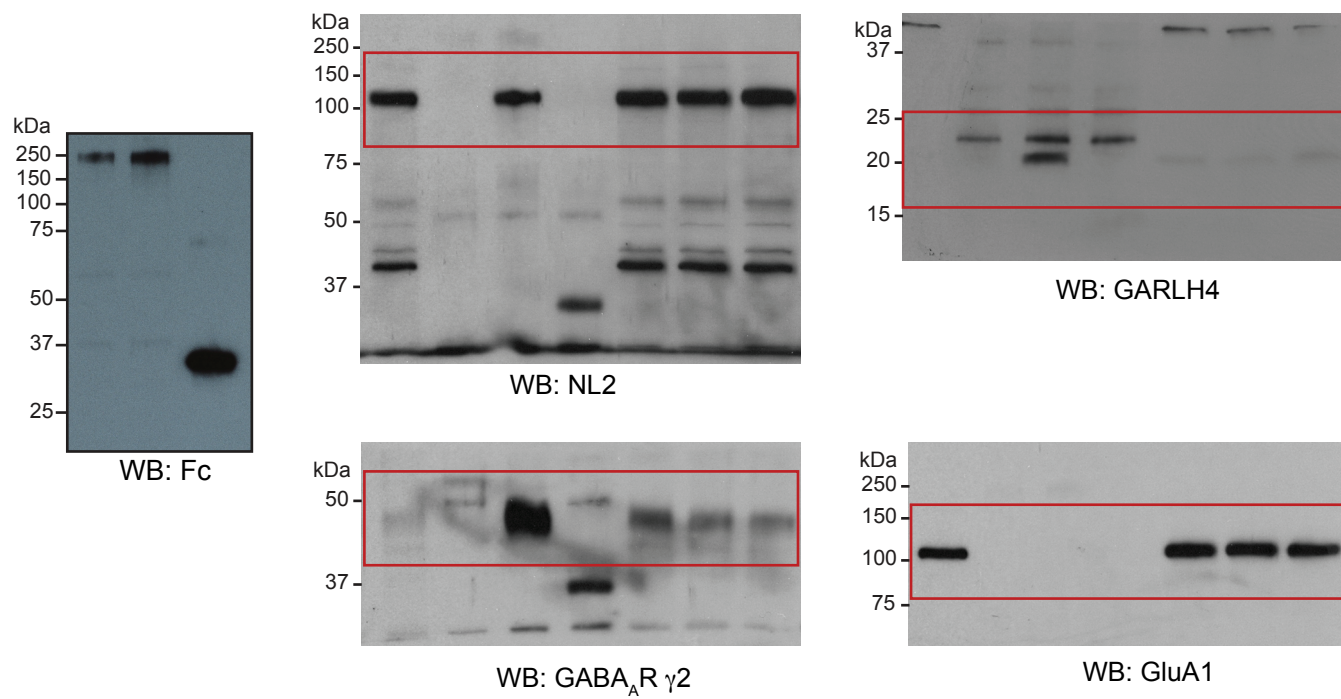

Supplement: supp [file elife_poa_e59613_Figure_1_source_data_2.pdf › elife_poa_e59613_Figure_1_source_data_2.pdf]
